# Supplementary material
Source: publisher figshare collection journal article supplement (https://acs.figshare.com/ndownloader/files/4143547)
Supplement: Supplementary file 1 [file 4143547]

 
data_an394d1 
 
_audit_creation_method            SHELXL-97 
_chemical_name_systematic 
; 
 ? 
; 
_chemical_name_common             ? 
_chemical_melting_point           ?
_symmetry_space_group_name_Hall   '-C 2yc' 
_chemical_formula_moiety          'C36 H33 Cu N12 O6, 2(Br),2(O)' 
_chemical_formula_sum 
 'C36 H33 Br2 Cu N12 O8' 
_chemical_formula_weight          985.10 
 
loop_ 
 _atom_type_symbol 
 _atom_type_description 
 _atom_type_scat_dispersion_real 
 _atom_type_scat_dispersion_imag 
 _atom_type_scat_source 
 'C'  'C'   0.0033   0.0016 
 'International Tables Vol C Tables 4.2.6.8 and 6.1.1.4' 
 'H'  'H'   0.0000   0.0000 
 'International Tables Vol C Tables 4.2.6.8 and 6.1.1.4' 
 'N'  'N'   0.0061   0.0033 
 'International Tables Vol C Tables 4.2.6.8 and 6.1.1.4' 
 'O'  'O'   0.0106   0.0060 
 'International Tables Vol C Tables 4.2.6.8 and 6.1.1.4' 
 'Cu'  'Cu'   0.3201   1.2651 
 'International Tables Vol C Tables 4.2.6.8 and 6.1.1.4' 
 'Br'  'Br'  -0.2901   2.4595 
 'International Tables Vol C Tables 4.2.6.8 and 6.1.1.4' 
 
_symmetry_cell_setting            'monoclinic' 
_symmetry_space_group_name_H-M    'C 2/c' 
 
loop_ 
 _symmetry_equiv_pos_as_xyz 
 'x, y, z' 
 '-x, y, -z+1/2' 
 'x+1/2, y+1/2, z' 
 '-x+1/2, y+1/2, -z+1/2' 
 '-x, -y, -z' 
 'x, -y, z-1/2' 
 '-x+1/2, -y+1/2, -z' 
 'x+1/2, -y+1/2, z-1/2' 
 
_cell_length_a                    22.625(5) 
_cell_length_b                    9.293(2) 
_cell_length_c                    21.596(7) 
_cell_angle_alpha                 90.00 
_cell_angle_beta                  118.573(3) 
_cell_angle_gamma                 90.00 
_cell_volume                      3987.8(18) 
_cell_formula_units_Z             4 
_cell_measurement_temperature     100(2) 
_cell_measurement_reflns_used     ? 
_cell_measurement_theta_min       ? 
_cell_measurement_theta_max       ? 
 
_exptl_crystal_description        'plate' 
_exptl_crystal_colour             'green' 
_exptl_crystal_size_max           0.23 
_exptl_crystal_size_mid           0.12 
_exptl_crystal_size_min           0.09 
_exptl_crystal_density_meas       ? 
_exptl_crystal_density_diffrn     1.641 
_exptl_crystal_density_method     'not measured' 
_exptl_crystal_F_000              1984 
_exptl_absorpt_coefficient_mu     2.619 
_exptl_absorpt_correction_type    'multi-scan' 
_exptl_absorpt_correction_T_min   0.5842 
_exptl_absorpt_correction_T_max   0.7984 
_exptl_absorpt_process_details    'sadabs' 
 
_exptl_special_details 
; 
 ? 
; 
 
_diffrn_ambient_temperature       100(2) 
_diffrn_radiation_wavelength      0.71073 
_diffrn_radiation_type            MoK\a 
_diffrn_radiation_source          'fine-focus sealed tube' 
_diffrn_radiation_monochromator   graphite 
_diffrn_measurement_device_type   'Bruker Apex II' 
_diffrn_measurement_method        'phi-omega scan' 
_diffrn_detector_area_resol_mean  3 
_diffrn_standards_number          ? 
_diffrn_standards_interval_count  ? 
_diffrn_standards_interval_time   ? 
_diffrn_standards_decay_%         ? 
_diffrn_reflns_number             4013 
_diffrn_reflns_av_R_equivalents   0.0583 
_diffrn_reflns_av_sigmaI/netI     0.0734 
_diffrn_reflns_limit_h_min        -19 
_diffrn_reflns_limit_h_max        20 
_diffrn_reflns_limit_k_min        -8 
_diffrn_reflns_limit_k_max        7 
_diffrn_reflns_limit_l_min        -19 
_diffrn_reflns_limit_l_max        14 
_diffrn_reflns_theta_min          2.05 
_diffrn_reflns_theta_max          19.32 
_reflns_number_total              1651 
_reflns_number_gt                 1128 
_reflns_threshold_expression      >2sigma(I) 
 
_computing_data_collection        'Bruker Apex II' 
_computing_cell_refinement        'Bruker Apex II' 
_computing_data_reduction         'SAINT' 
_computing_structure_solution     'SHELXS-97 (Sheldrick, 1990)' 
_computing_structure_refinement   'SHELXL-97 (Sheldrick, 1997)' 
_computing_molecular_graphics     'Mercury 2.3' 
_computing_publication_material   'SHELXTL-97' 
 
_refine_special_details 
; 
 Refinement of F^2^ against ALL reflections.  The weighted R-factor wR and 
 goodness of fit S are based on F^2^, conventional R-factors R are based 
 on F, with F set to zero for negative F^2^. The threshold expression of 
 F^2^ > 2sigma(F^2^) is used only for calculating R-factors(gt) etc. and is 
 not relevant to the choice of reflections for refinement.  R-factors based 
 on F^2^ are statistically about twice as large as those based on F, and R- 
 factors based on ALL data will be even larger. 
; 
 
_refine_ls_structure_factor_coef  Fsqd  
_refine_ls_matrix_type            full 
_refine_ls_weighting_scheme       calc  
_refine_ls_weighting_details 
 'calc w=1/[\s^2^(Fo^2^)+(0.1728P)^2^+63.5862P] where P=(Fo^2^+2Fc^2^)/3' 
_atom_sites_solution_primary      direct 
_atom_sites_solution_secondary    difmap 
_atom_sites_solution_hydrogens    geom 
_refine_ls_hydrogen_treatment     constr 
_refine_ls_extinction_method      none 
_refine_ls_extinction_coef        ? 
_refine_ls_number_reflns          1651 
_refine_ls_number_parameters      268 
_refine_ls_number_restraints      0 
_refine_ls_R_factor_all           0.0936 
_refine_ls_R_factor_gt            0.0610 
_refine_ls_wR_factor_ref          0.2051 
_refine_ls_wR_factor_gt           0.1689 
_refine_ls_goodness_of_fit_ref    0.757 
_refine_ls_restrained_S_all       0.757 
_refine_ls_shift/su_max           0.000 
_refine_ls_shift/su_mean          0.000 
 
loop_ 
 _atom_site_label 
 _atom_site_type_symbol 
 _atom_site_fract_x 
 _atom_site_fract_y 
 _atom_site_fract_z 
 _atom_site_U_iso_or_equiv 
 _atom_site_adp_type 
 _atom_site_occupancy 
 _atom_site_symmetry_multiplicity 
 _atom_site_calc_flag 
 _atom_site_refinement_flags 
 _atom_site_disorder_assembly 
 _atom_site_disorder_group 
Cu1 Cu 0.5000 1.1710(2) 0.2500 0.0406(8) Uani 1 2 d S . . 
Br1 Br 0.45571(8) 0.32903(19) 0.83571(7) 0.0722(8) Uani 1 1 d . . . 
N2 N 0.3988(5) 1.1858(11) 0.1862(5) 0.037(3) Uani 1 1 d . . . 
C3 C 0.3622(8) 1.2827(14) 0.1990(7) 0.044(4) Uani 1 1 d . . . 
H3 H 0.3835 1.3375 0.2399 0.053 Uiso 1 1 calc R . . 
C4 C 0.2944(8) 1.3058(14) 0.1547(8) 0.047(4) Uani 1 1 d . . . 
H4 H 0.2713 1.3776 0.1643 0.057 Uiso 1 1 calc R . . 
C5 C 0.2626(7) 1.2215(14) 0.0971(8) 0.041(3) Uani 1 1 d . . . 
H5 H 0.2168 1.2339 0.0670 0.049 Uiso 1 1 calc R . . 
C6 C 0.2981(7) 1.1156(14) 0.0826(7) 0.039(3) Uani 1 1 d . . . 
C7 C 0.3678(7) 1.1024(13) 0.1305(7) 0.032(3) Uani 1 1 d . . . 
H7 H 0.3925 1.0323 0.1222 0.039 Uiso 1 1 calc R . . 
N8 N 0.2631(5) 1.0277(11) 0.0226(5) 0.040(3) Uani 1 1 d . . . 
H8 H 0.2201 1.0236 0.0050 0.047 Uiso 1 1 calc R . . 
C9 C 0.2907(9) 0.9487(14) -0.0102(7) 0.044(4) Uani 1 1 d . . . 
O10 O 0.3505(5) 0.9439(9) 0.0087(4) 0.047(2) Uani 1 1 d . . . 
N11 N 0.2436(6) 0.8742(12) -0.0674(6) 0.047(3) Uani 1 1 d . . . 
H11 H 0.2020 0.8895 -0.0794 0.056 Uiso 1 1 calc R . . 
C12 C 0.2573(7) 0.7745(14) -0.1082(7) 0.044(4) Uani 1 1 d . . . 
C13 C 0.2111(6) 0.7594(15) -0.1796(7) 0.045(4) Uani 1 1 d . . . 
H13 H 0.1729 0.8171 -0.2005 0.054 Uiso 1 1 calc R . . 
C14 C 0.2231(7) 0.6577(16) -0.2184(7) 0.057(4) Uani 1 1 d . . . 
H14 H 0.1931 0.6486 -0.2662 0.068 Uiso 1 1 calc R . . 
C15 C 0.2784(8) 0.5691(15) -0.1882(7) 0.051(4) Uani 1 1 d . . . 
H15 H 0.2858 0.5001 -0.2150 0.061 Uiso 1 1 calc R . . 
C16 C 0.3230(6) 0.5851(14) -0.1166(6) 0.033(3) Uani 1 1 d . . . 
C17 C 0.3138(7) 0.6879(14) -0.0767(6) 0.036(3) Uani 1 1 d . . . 
H17 H 0.3449 0.6993 -0.0293 0.043 Uiso 1 1 calc R . . 
N18 N 0.3794(5) 0.4894(11) -0.0866(5) 0.039(3) Uani 1 1 d . . . 
H18 H 0.3987 0.4708 -0.1116 0.046 Uiso 1 1 calc R . . 
C19 C 0.4051(7) 0.4254(14) -0.0226(7) 0.040(3) Uani 1 1 d . . . 
O20 O 0.3812(4) 0.4420(9) 0.0183(5) 0.046(2) Uani 1 1 d . . . 
N21 N 0.4582(5) 0.3383(11) -0.0074(5) 0.037(3) Uani 1 1 d . . . 
H21 H 0.4728 0.3379 -0.0376 0.045 Uiso 1 1 calc R . . 
C22 C 0.4922(6) 0.2491(14) 0.0512(6) 0.035(3) Uani 1 1 d . . . 
C23 C 0.5398(6) 0.1547(14) 0.0509(6) 0.035(3) Uani 1 1 d . . . 
H23 H 0.5486 0.1526 0.0130 0.042 Uiso 1 1 calc R . . 
C24 C 0.5736(6) 0.0647(14) 0.1075(7) 0.046(4) Uani 1 1 d . . . 
H24 H 0.6049 -0.0005 0.1078 0.055 Uiso 1 1 calc R . . 
C25 C 0.5609(7) 0.0710(17) 0.1646(7) 0.052(4) Uani 1 1 d . . . 
H25 H 0.5838 0.0095 0.2027 0.062 Uiso 1 1 calc R . . 
N26 N 0.5165(5) 0.1641(12) 0.1651(5) 0.038(3) Uani 1 1 d . . . 
C27 C 0.4838(6) 0.2539(15) 0.1106(7) 0.039(3) Uani 1 1 d . . . 
H27 H 0.4546 0.3216 0.1128 0.047 Uiso 1 1 calc R . . 
O28 O 0.5000 1.4320(15) 0.2500 0.081(5) Uani 1 2 d S . . 
H28 H 0.5052 1.4614 0.2881 0.122 Uiso 0.50 1 calc PR . . 
O29 O 0.5000 0.9077(13) 0.2500 0.051(3) Uani 1 2 d S . . 
O30A O 0.1041(10) 0.923(2) 0.8634(10) 0.094(6) Uiso 0.58 1 d P . . 
O30B O 0.1031(15) 0.787(3) 0.8800(15) 0.108(10) Uiso 0.42 1 d P . . 
 
loop_ 
 _atom_site_aniso_label 
 _atom_site_aniso_U_11 
 _atom_site_aniso_U_22 
 _atom_site_aniso_U_33 
 _atom_site_aniso_U_23 
 _atom_site_aniso_U_13 
 _atom_site_aniso_U_12 
Cu1 0.0509(16) 0.0505(16) 0.0184(13) 0.000 0.0151(11) 0.000 
Br1 0.0832(14) 0.0955(15) 0.0465(11) -0.0098(8) 0.0379(10) -0.0162(10) 
N2 0.059(8) 0.036(7) 0.014(6) -0.001(5) 0.016(6) 0.010(6) 
C3 0.079(13) 0.035(9) 0.030(8) 0.001(6) 0.036(10) 0.006(8) 
C4 0.061(12) 0.039(9) 0.049(9) 0.002(8) 0.031(9) 0.013(8) 
C5 0.041(9) 0.035(9) 0.055(10) 0.017(8) 0.029(8) 0.004(8) 
C6 0.050(12) 0.038(9) 0.043(9) 0.014(8) 0.033(9) 0.005(8) 
C7 0.039(10) 0.033(8) 0.025(8) 0.019(7) 0.015(8) 0.005(7) 
N8 0.035(7) 0.046(7) 0.036(7) -0.001(6) 0.016(6) -0.003(6) 
C9 0.049(12) 0.043(10) 0.029(9) 0.007(8) 0.010(10) 0.004(9) 
O10 0.044(7) 0.061(7) 0.036(5) -0.022(4) 0.019(5) -0.006(5) 
N11 0.049(8) 0.048(8) 0.033(7) 0.002(6) 0.012(7) 0.000(6) 
C12 0.052(11) 0.023(8) 0.046(10) 0.000(8) 0.015(9) -0.014(8) 
C13 0.030(8) 0.045(9) 0.027(9) -0.002(7) -0.013(7) -0.004(7) 
C14 0.069(12) 0.052(10) 0.020(8) 0.006(8) -0.003(8) -0.001(9) 
C15 0.068(11) 0.056(10) 0.022(9) 0.002(7) 0.016(8) -0.002(9) 
C16 0.025(8) 0.039(9) 0.022(9) 0.009(7) 0.002(7) -0.006(7) 
C17 0.041(9) 0.034(9) 0.023(7) -0.002(7) 0.009(7) -0.016(7) 
N18 0.043(8) 0.054(7) 0.015(6) 0.000(6) 0.010(5) -0.006(6) 
C19 0.042(10) 0.036(9) 0.021(9) -0.004(7) -0.002(8) -0.003(8) 
O20 0.035(6) 0.067(7) 0.033(5) 0.012(5) 0.015(5) 0.005(4) 
N21 0.039(7) 0.051(7) 0.024(7) 0.003(6) 0.017(6) 0.001(6) 
C22 0.021(8) 0.054(9) 0.025(9) 0.009(7) 0.007(7) -0.003(7) 
C23 0.018(8) 0.048(9) 0.030(8) 0.003(7) 0.005(7) -0.009(7) 
C24 0.043(9) 0.058(10) 0.041(9) 0.002(8) 0.023(8) 0.013(8) 
C25 0.053(10) 0.065(11) 0.031(9) 0.005(7) 0.015(8) 0.008(9) 
N26 0.044(7) 0.049(7) 0.013(6) 0.013(6) 0.008(6) 0.007(6) 
C27 0.035(8) 0.065(10) 0.024(8) -0.009(8) 0.018(7) 0.002(7) 
O28 0.139(14) 0.070(11) 0.067(11) 0.000 0.076(12) 0.000 
O29 0.063(9) 0.058(8) 0.031(7) 0.000 0.022(7) 0.000 
 
_geom_special_details 
; 
 All esds (except the esd in the dihedral angle between two l.s. planes) 
 are estimated using the full covariance matrix.  The cell esds are taken 
 into account individually in the estimation of esds in distances, angles 
 and torsion angles; correlations between esds in cell parameters are only 
 used when they are defined by crystal symmetry.  An approximate (isotropic) 
 treatment of cell esds is used for estimating esds involving l.s. planes. 
; 
 
loop_ 
 _geom_bond_atom_site_label_1 
 _geom_bond_atom_site_label_2 
 _geom_bond_distance 
 _geom_bond_site_symmetry_2 
 _geom_bond_publ_flag 
Cu1 N2 2.035(11) . ? 
Cu1 N2 2.035(11) 2_655 ? 
Cu1 N26 2.039(10) 2_665 ? 
Cu1 N26 2.039(10) 1_565 ? 
Cu1 O28 2.425(14) . ? 
N2 C7 1.316(14) . ? 
N2 C3 1.339(15) . ? 
C3 C4 1.381(18) . ? 
C3 H3 0.9300 . ? 
C4 C5 1.350(17) . ? 
C4 H4 0.9300 . ? 
C5 C6 1.398(17) . ? 
C5 H5 0.9300 . ? 
C6 N8 1.411(15) . ? 
C6 C7 1.418(16) . ? 
C7 H7 0.9300 . ? 
N8 C9 1.362(16) . ? 
N8 H8 0.8600 . ? 
C9 O10 1.213(15) . ? 
C9 N11 1.371(16) . ? 
N11 C12 1.411(16) . ? 
N11 H11 0.8600 . ? 
C12 C17 1.383(17) . ? 
C12 C13 1.396(17) . ? 
C13 C14 1.373(18) . ? 
C13 H13 0.9300 . ? 
C14 C15 1.374(18) . ? 
C14 H14 0.9300 . ? 
C15 C16 1.393(16) . ? 
C15 H15 0.9300 . ? 
C16 C17 1.368(16) . ? 
C16 N18 1.430(15) . ? 
C17 H17 0.9300 . ? 
N18 C19 1.354(15) . ? 
N18 H18 0.8600 . ? 
C19 O20 1.247(15) . ? 
C19 N21 1.353(16) . ? 
N21 C22 1.397(15) . ? 
N21 H21 0.8600 . ? 
C22 C27 1.384(15) . ? 
C22 C23 1.392(16) . ? 
C23 C24 1.373(16) . ? 
C23 H23 0.9300 . ? 
C24 C25 1.394(16) . ? 
C24 H24 0.9300 . ? 
C25 N26 1.330(16) . ? 
C25 H25 0.9300 . ? 
N26 C27 1.341(15) . ? 
N26 Cu1 2.039(10) 1_545 ? 
C27 H27 0.9300 . ? 
O28 H28 0.8200 . ? 
O30A O30B 1.32(3) . ? 
 
loop_ 
 _geom_angle_atom_site_label_1 
 _geom_angle_atom_site_label_2 
 _geom_angle_atom_site_label_3 
 _geom_angle 
 _geom_angle_site_symmetry_1 
 _geom_angle_site_symmetry_3 
 _geom_angle_publ_flag 
N2 Cu1 N2 172.3(6) . 2_655 ? 
N2 Cu1 N26 88.8(4) . 2_665 ? 
N2 Cu1 N26 91.4(4) 2_655 2_665 ? 
N2 Cu1 N26 91.4(4) . 1_565 ? 
N2 Cu1 N26 88.8(4) 2_655 1_565 ? 
N26 Cu1 N26 176.4(6) 2_665 1_565 ? 
N2 Cu1 O28 86.1(3) . . ? 
N2 Cu1 O28 86.1(3) 2_655 . ? 
N26 Cu1 O28 91.8(3) 2_665 . ? 
N26 Cu1 O28 91.8(3) 1_565 . ? 
C7 N2 C3 118.2(11) . . ? 
C7 N2 Cu1 120.9(9) . . ? 
C3 N2 Cu1 120.8(10) . . ? 
N2 C3 C4 123.6(12) . . ? 
N2 C3 H3 118.2 . . ? 
C4 C3 H3 118.2 . . ? 
C5 C4 C3 118.3(12) . . ? 
C5 C4 H4 120.9 . . ? 
C3 C4 H4 120.9 . . ? 
C4 C5 C6 120.4(13) . . ? 
C4 C5 H5 119.8 . . ? 
C6 C5 H5 119.8 . . ? 
C5 C6 N8 118.9(13) . . ? 
C5 C6 C7 117.0(12) . . ? 
N8 C6 C7 124.1(12) . . ? 
N2 C7 C6 122.4(12) . . ? 
N2 C7 H7 118.8 . . ? 
C6 C7 H7 118.8 . . ? 
C9 N8 C6 126.4(11) . . ? 
C9 N8 H8 116.8 . . ? 
C6 N8 H8 116.8 . . ? 
O10 C9 N8 124.0(13) . . ? 
O10 C9 N11 123.1(14) . . ? 
N8 C9 N11 112.9(14) . . ? 
C9 N11 C12 125.8(12) . . ? 
C9 N11 H11 117.1 . . ? 
C12 N11 H11 117.1 . . ? 
C17 C12 C13 120.8(13) . . ? 
C17 C12 N11 120.1(12) . . ? 
C13 C12 N11 118.9(13) . . ? 
C14 C13 C12 118.8(13) . . ? 
C14 C13 H13 120.6 . . ? 
C12 C13 H13 120.6 . . ? 
C13 C14 C15 121.6(12) . . ? 
C13 C14 H14 119.2 . . ? 
C15 C14 H14 119.2 . . ? 
C14 C15 C16 118.3(13) . . ? 
C14 C15 H15 120.8 . . ? 
C16 C15 H15 120.8 . . ? 
C17 C16 C15 121.7(12) . . ? 
C17 C16 N18 121.4(10) . . ? 
C15 C16 N18 116.9(12) . . ? 
C16 C17 C12 118.7(11) . . ? 
C16 C17 H17 120.6 . . ? 
C12 C17 H17 120.6 . . ? 
C19 N18 C16 126.2(11) . . ? 
C19 N18 H18 116.9 . . ? 
C16 N18 H18 116.9 . . ? 
O20 C19 N21 122.6(11) . . ? 
O20 C19 N18 123.3(13) . . ? 
N21 C19 N18 114.1(13) . . ? 
C19 N21 C22 127.9(11) . . ? 
C19 N21 H21 116.0 . . ? 
C22 N21 H21 116.0 . . ? 
C27 C22 C23 118.3(11) . . ? 
C27 C22 N21 124.1(13) . . ? 
C23 C22 N21 117.5(11) . . ? 
C24 C23 C22 118.9(12) . . ? 
C24 C23 H23 120.6 . . ? 
C22 C23 H23 120.6 . . ? 
C23 C24 C25 119.9(12) . . ? 
C23 C24 H24 120.0 . . ? 
C25 C24 H24 120.0 . . ? 
N26 C25 C24 120.7(12) . . ? 
N26 C25 H25 119.6 . . ? 
C24 C25 H25 119.6 . . ? 
C25 N26 C27 119.9(11) . . ? 
C25 N26 Cu1 119.5(8) . 1_545 ? 
C27 N26 Cu1 120.6(9) . 1_545 ? 
N26 C27 C22 122.1(12) . . ? 
N26 C27 H27 119.0 . . ? 
C22 C27 H27 119.0 . . ? 
Cu1 O28 H28 109.5 . . ? 
 
loop_ 
 _geom_hbond_atom_site_label_D 
 _geom_hbond_atom_site_label_H 
 _geom_hbond_atom_site_label_A 
 _geom_hbond_distance_DH 
 _geom_hbond_distance_HA 
 _geom_hbond_distance_DA 
 _geom_hbond_angle_DHA 
 _geom_hbond_site_symmetry_A 
O28 H28 Br1  0.82 2.68 3.337(9) 137.8 6_575 
N21 H21 Br1  0.86 2.57 3.362(9) 152.6 1_554 
N18 H18 Br1  0.86 2.47 3.285(10) 158.7 1_554 
N8 H8 O20  0.86 2.12 2.959(13) 164.6 7_565 
 
_diffrn_measured_fraction_theta_max    0.980 
_diffrn_reflns_theta_full              19.32 
_diffrn_measured_fraction_theta_full   0.980 
_refine_diff_density_max    0.863 
_refine_diff_density_min   -0.438 
_refine_diff_density_rms    0.090 
#
_vrf_THETM01_an394d1 
;
PROBLEM: The value of sine(theta_max)/wavelength is less than 0.550
            Calculated sin(theta_max)/wavelength =    0.4655
RESPONSE: The crystal was poorly diffracting at higher Bragg angles.
The situation did not improve even after recrystallisation and fresh
data collection.
;
_vrf_REFNR01_an394d1 
;
PROBLM: Ratio of reflections to parameters is < 8 for a
            centrosymmetric structure
            sine(theta)/lambda                0.4655
            Proportion of unique data used    1.0000
            Ratio reflections to parameters   6.1604.
RESPONSE: The crystal was poorly diffracting at higher Bragg angles.
The situation did not improve even after recrystallisation and fresh
data collection.
;
_vrf_PLAT088_an394d1 
;
PROBLEM: Poor Data / Parameter Ratio ....................       6.16  
RESPONSE: The crystal was poorly diffracting at higher Bragg angles.
The situation did not improve even after recrystallisation and fresh
data collection.
;
_vrf_PLAT430_an394d1 
; 
PROBLEM: Short Inter D...A Contact  O20    ..  O30A    ..       2.72 Ang. 
RESPONSE: We are unable to locate the H-atoms associated with the solvent water molecule containing O30A.
;
_vrf_PLAT431_an394d1 
; 
PROBLEM: Short Inter HL..A  Contact  Br1    ..  O30B    .       3.02 Ang. 
RESPONSE: We are unable to locate the H-atoms associated with the solvent water molecule containing O30B.
;
# end Validation Reply Form
